# Supplementary material for: Iron cation vacancies in Pt(iv)-doped hematite
Source: Royal Society of Chemistry journal article supplement (doi:10.1039/d1ma00458a), 2021-01-01
Supplement: d1ma00458a1.csv [file d1ma00458a1.csv]

	Si	Al	Ca	Sb	Ti	Pt	Fe	Mn	Mg	O	cations
1	0.00169	0.07425	0.00150	0.00366	0.07387	0.24885	1.31311	0.00632	0.25000	3.00000	1.97325
2	0.00108	0.07577	0.00165	0.00290	0.07521	0.24266	1.32277	0.00644	0.24574	3.00000	1.97421
3	0.00075	0.07503	0.00153	0.00315	0.07295	0.24759	1.31895	0.00646	0.24736	3.00000	1.97376
4	0.00150	0.07814	0.00202	0.00410	0.07447	0.26680	1.27673	0.00739	0.25881	3.00000	1.96996
5	0.00184	0.07691	0.00255	0.00329	0.07480	0.26510	1.27861	0.00758	0.26110	3.00000	1.97178
6	0.00006	0.07572	0.00118	0.00338	0.07228	0.25179	1.30976	0.00694	0.25350	3.00000	1.97460
7	0.00092	0.08150	0.00182	0.00295	0.07986	0.23584	1.32163	0.00702	0.24234	3.00000	1.97388
8	0.00090	0.07976	0.00237	0.00333	0.08419	0.21037	1.35861	0.00713	0.23015	3.00000	1.97681
9	0.00021	0.07913	0.00256	0.00360	0.07405	0.26139	1.28358	0.00725	0.26221	3.00000	1.97398
10	0.00075	0.07685	0.00241	0.00359	0.07314	0.25493	1.29967	0.00683	0.25596	3.00000	1.97413
11	0.00169	0.07802	0.00196	0.00396	0.07539	0.25656	1.28841	0.00666	0.26122	3.00000	1.97387
12	0.00028	0.07625	0.00148	0.00280	0.07438	0.25414	1.30021	0.00731	0.25826	3.00000	1.97511
13	0.00125	0.07878	0.00159	0.00335	0.07396	0.25690	1.29080	0.00691	0.26108	3.00000	1.97462
14	0.00079	0.07742	0.00249	0.00333	0.07311	0.25665	1.29487	0.00748	0.25845	3.00000	1.97458
15	0.00010	0.07730	0.00290	0.00396	0.07717	0.26260	1.27475	0.00617	0.27014	3.00000	1.97509
16	0.00138	0.07732	0.00429	0.00333	0.07520	0.26071	1.28033	0.00676	0.26619	3.00000	1.97551
17	0.00024	0.07838	0.00108	0.00280	0.07436	0.25998	1.28942	0.00700	0.26058	3.00000	1.97383
18	0.00093	0.07674	0.00231	0.00426	0.09145	0.15778	1.42907	0.00731	0.21704	3.00000	1.98689
19	0.00000	0.07591	0.00079	0.00395	0.07425	0.24064	1.32479	0.00697	0.24805	3.00000	1.97535
20	0.00006	0.07730	0.00103	0.00359	0.07524	0.24429	1.31761	0.00684	0.24820	3.00000	1.97415
21	0.00000	0.07669	0.00120	0.00276	0.07286	0.25586	1.30297	0.00671	0.25492	3.00000	1.97396
22	0.00143	0.07672	0.00191	0.00395	0.07334	0.25803	1.29750	0.00690	0.25095	3.00000	1.97072
23	0.00137	0.07776	0.00210	0.00278	0.07549	0.25706	1.29405	0.00677	0.25526	3.00000	1.97263
24	0.00009	0.07814	0.00201	0.00338	0.07288	0.25465	1.30085	0.00719	0.25500	3.00000	1.97421
25	0.00035	0.08146	0.00166	0.00310	0.07478	0.24827	1.30445	0.00703	0.25441	3.00000	1.97549
26	0.00097	0.07973	0.00173	0.00254	0.07863	0.23615	1.32006	0.00698	0.25029	3.00000	1.97707
27	0.00028	0.08075	0.00107	0.00358	0.08090	0.22957	1.32594	0.00649	0.24871	3.00000	1.97729
